# Supplementary material for: Body Size and Bite Force of Stray and Feral Cats—Are Bigger or Older Cats Taking the Largest or More Difficult-to-Handle Prey?
Source: MDPI journal article supplement (doi:10.3390/ani10040707), 2020-04-17
Supplement: s1 [file s1]

Article

# Supplementary Files: Body Size and Bite Force of Stray and Feral Cats—Are Bigger or Older Cats Taking the Largest or More Difficult-to-Handle Prey?

Patricia A. Fleming \*, Heather M. Crawford, Clare Auckland, and Michael C. Calver

**Table S1.** Locations where 567 feral and stray cats (*Felis catus*) were sourced across southwest Western Australia between 2010 and 2018.

| Rural Locations (Feral cats $n = 419$ ): | Urban Locations (Stray cats $n = 148$ ): |
|------------------------------------------|------------------------------------------|
| Badgingarra                              | Armadale                                 |
| Bindoon                                  | Aubin Grove                              |
| Boonanaring                              | Balcatta                                 |
| Boyagin                                  | Balga                                    |
| Busselton                                | Bayswater                                |
| Contine                                  | Beaconsfield                             |
| Coorow                                   | Bedfordale                               |
| Cowaramup                                | Beldon                                   |
| Cuballing                                | Bellevue                                 |
| Cullalla                                 | Bentley                                  |
| Darkan                                   | Bibra Lake                               |
| Dowerin                                  | Bickley                                  |
| Dowerin                                  | Bicton                                   |
| Dryandra                                 | Carabooda                                |
| Esperance                                | Coogee                                   |
| Gillingarra                              | Coolbellup                               |
| Gingin                                   | Cottesloe                                |
| Harvey                                   | Dianella                                 |
| Kellerberrin                             | East Victoria Park                       |
| Lancelin                                 | Golden Bay                               |
| Lennard Brook                            | Gosnells                                 |
| Marchagee                                | Gwelup                                   |
| Mogumber                                 | Hamersley                                |
| Mooliabeenee                             | Hamilton Hill                            |
| Moondah                                  | Hazelmere                                |
| Mount Barker                             | High Wycombe                             |
| Mount Caroline                           | Highgate                                 |
| Narrikup                                 | Innaloo                                  |
| Narrogin                                 | Jandakot                                 |
| Orange Springs                           | Kardinya                                 |
| Popanyinning                             | Martin                                   |
| Red Gully                                | Maylands                                 |
|                                          | Medina                                   |
|                                          | Munster                                  |
|                                          | Murdoch                                  |
|                                          | North Coogee                             |
|                                          | O'Connor                                 |

| <b>Rural Locations (Feral cats <math>n = 419</math>):</b> | <b>Urban Locations (Stray cats <math>n = 148</math>):</b>                                                          |
|-----------------------------------------------------------|--------------------------------------------------------------------------------------------------------------------|
| Seabird<br>Takalarup<br>Torbay<br>Williams                | Osborne Park<br>Perth Airport<br>Port Kennedy<br>Sorrento<br>South Guildford<br>Spearwood<br>St James<br>Welshpool |

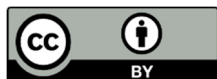

© 2020 by the authors. Licensee MDPI, Basel, Switzerland. This article is an open access article distributed under the terms and conditions of the Creative Commons Attribution (CC BY) license (<http://creativecommons.org/licenses/by/4.0/>).
